# Supplementary material
Source: PubMed Central journal article supplement (PMC4617167)
Supplement: supp_WNL.0000000000002018_Table_e-1.pdf [file supp_WNL.0000000000002018_Table_e-1.pdf]

**Table e-1: Peptide concentrations in patient and control groups**

|                            | <b>bvFTD</b>           | <b>SD</b>             | <b>AD</b>             | <b>controls</b>       | <b>H value<br/>(p value)</b> | <b>Post hoc test</b>                   |
|----------------------------|------------------------|-----------------------|-----------------------|-----------------------|------------------------------|----------------------------------------|
| Leptin mean $\pm$ SD pg/ml | 17567 $\pm$ 16267      | 11945 $\pm$ 10548     | 11441 $\pm$ 13066     | 13159 $\pm$ 19419     | 4.3 ( $p = .185$ )           | NA                                     |
| <b>Median (IQR)</b>        | 12824 (6640-<br>25503) | 7701 (4362-<br>18771) | 7726 (3326-<br>12237) | 5878 (3068-<br>14191) |                              |                                        |
| CCK pg/ml mean             | 239 $\pm$ 171          | 261 $\pm$ 122         | 245 $\pm$ 177         | 246 $\pm$ 130         | 1.5 ( $p = .671$ )           | NA                                     |
| <b>Median (IQR)</b>        | 198 (118-271)          | 258 (142-328)         | 177 (96-370)          | 185 (153-341)         |                              |                                        |
| Ghrelin mean ng/ml         | 11 $\pm$ 6             | 9 $\pm$ 8             | 10 $\pm$ 6            | 12 $\pm$ 10           | .9 ( $p = .809$ )            | NA                                     |
| <b>Median (IQR)</b>        | 10 (8-15)              | 9 (4-17)              | 9 (5-14)              | 12 (3-21)             |                              |                                        |
| PYY mean pg/ml             | 395 $\pm$ 242          | 443 $\pm$ 230         | 398 $\pm$ 303         | 414 $\pm$ 284         | 2.2 ( $p = .536$ )           | NA                                     |
| <b>Median (IQR)</b>        | 356 (207-508)          | 359 (276-548)         | 292 (203-527)         | 324 (236-517)         |                              |                                        |
| Oxytocin mean pg/ml        | 200 $\pm$ 161          | 185 $\pm$ 130         | 167 $\pm$ 94          | 179 $\pm$ 95          | 9.1 ( $p = .910$ )           | NA                                     |
| <b>Median (IQR)</b>        | 153 (121-206)          | 153 (126-215)         | 147 (107-216)         | 163 (109-238)         |                              |                                        |
| AgRP mean pg/ml            | 69 $\pm$ 89            | 62 $\pm$ 81           | 33 $\pm$ 25           | 23 $\pm$ 19           | 8.9* ( $p = .026$ )          | bvFTD > controls, sv-PPA<br>> controls |

---

|                     |            |            |            |            |
|---------------------|------------|------------|------------|------------|
| <b>Median (IQR)</b> | 29 (19-75) | 32 (21-63) | 26 (17-39) | 14 (10-29) |
|---------------------|------------|------------|------------|------------|

---

Degree of freedom = 3 for all variables

\*P < 0.05; missing samples: Leptin 4 AD, 1 control; CCK 1 sv-PPA, 6 AD, 1 control; PYY 1 control; AgRp: 1 bvFTD, 1 control
